# Supplementary material for: Synthesis of M-Ag3PO4, (M = Se, Ag, Ta) Nanoparticles and Their Antibacterial and Cytotoxicity Study
Source: MDPI journal article supplement (doi:10.3390/ijms231911403), 2022-09-27
Supplement: s1 [file s1]

# Synthesis of M-Ag<sub>3</sub>PO<sub>4</sub>, (M= Se, Ag, Ta) Nanoparticles and their Antibacterial and Cytotoxicity Study

Faiza Qureshi<sup>1,2</sup>, Muhammad Nawaz<sup>2\*</sup>, Mohammad Azam Ansari<sup>3</sup>, Firdos Alam Khan<sup>4</sup>,  
Mahmoud M. Berekaa<sup>5</sup>, Samar A. Abubshait<sup>2,6</sup>, Rayyanah Al-Mutairi<sup>2</sup>, Alok K. Paul<sup>7</sup>,  
Veeranoot Nissapatorn<sup>8</sup>, Maria de Lourdes Pereira<sup>9\*</sup>, and Polrat Wilairatana<sup>10</sup>

- <sup>1</sup> Deanship of Scientific Research, Imam Abdulrahman Bin Faisal University, P.O. Box 1982, Dammam 31441, Saudi Arabia
  - <sup>2</sup> Department of Nano-Medicine Research, Institute for Research and Medical Consultations (IRMC), Imam Abdulrahman Bin Faisal University, P.O. Box 1982, Dammam 31441, Saudi Arabia
  - <sup>3</sup> Department of Epidemic Disease Research, Institutes for Research and Medical Consultations (IRMC), Imam Abdulrahman Bin Faisal University, P.O. Box 1982, Dammam 31441, Saudi Arabia
  - <sup>4</sup> Department of Stem Cell Research, Institute for Research and Medical Consultations (IRMC), Imam Abdulrahman Bin Faisal University, P.O. Box 1982, Dammam 31441, Saudi Arabia
  - <sup>5</sup> Environmental Health Department, College of Public Health, Imam Abdulrahman Bin Faisal University, P.O. Box 1982, Dammam 31441, Saudi Arabia
  - <sup>6</sup> Department of Chemistry, College of Science and Basic & Applied Scientific Research Centre, Imam Abdulrahman Bin Faisal University, P.O. Box 1982, Dammam 31441, Saudi Arabia
  - <sup>7</sup> School of Pharmacy and Pharmacology, University of Tasmania, Hobart, TAS 7001, Australia
  - <sup>8</sup> School of Allied Health Sciences, World Union for Herbal Drug Discovery (WUHeDD), and Research Excellence Center for Innovation and Health Products (RECIHP), Walailak University, Nakhon Si Thammarat 80160, Thailand
  - <sup>9</sup> CICECO-Aveiro Institute of Materials & Department of Medical Sciences, University of Aveiro, 3810-193 Aveiro, Portugal
  - <sup>10</sup> Department of Clinical Tropical Medicine, Faculty of Tropical Medicine, Mahidol University, Bangkok 10400, Thailand
- \* Correspondence: mnmuhammad@iau.edu.sa (M.N.);  
mlourdespereira@ua.pt (M.d.L.P.)

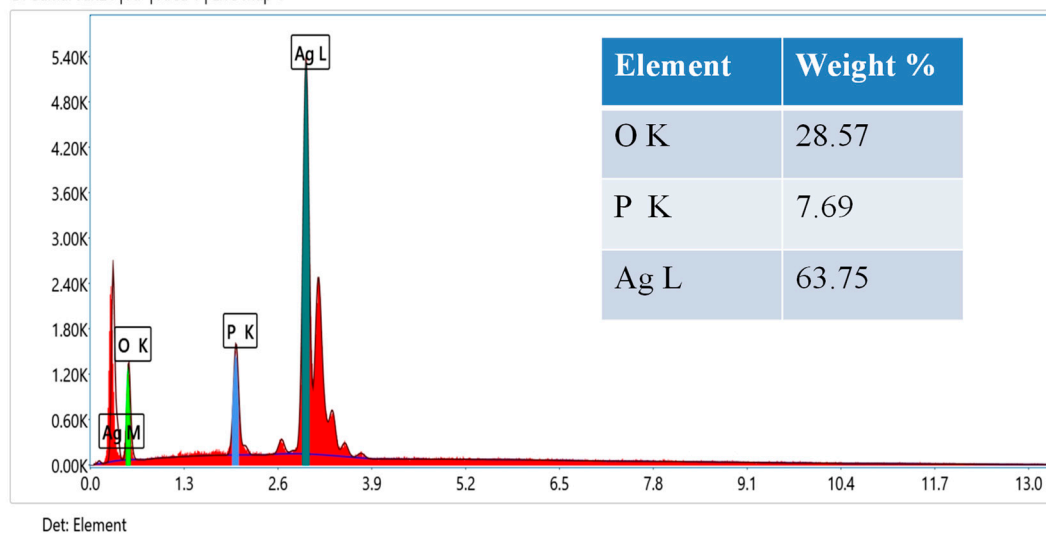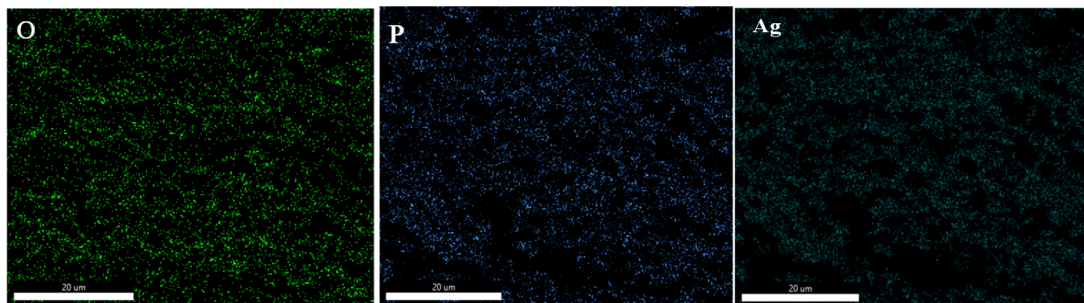

**Figure S1.** EDX spectrum and elemental (O, P, Ag) mapping of  $\text{Ag}_3\text{PO}_4$  nanoparticles.

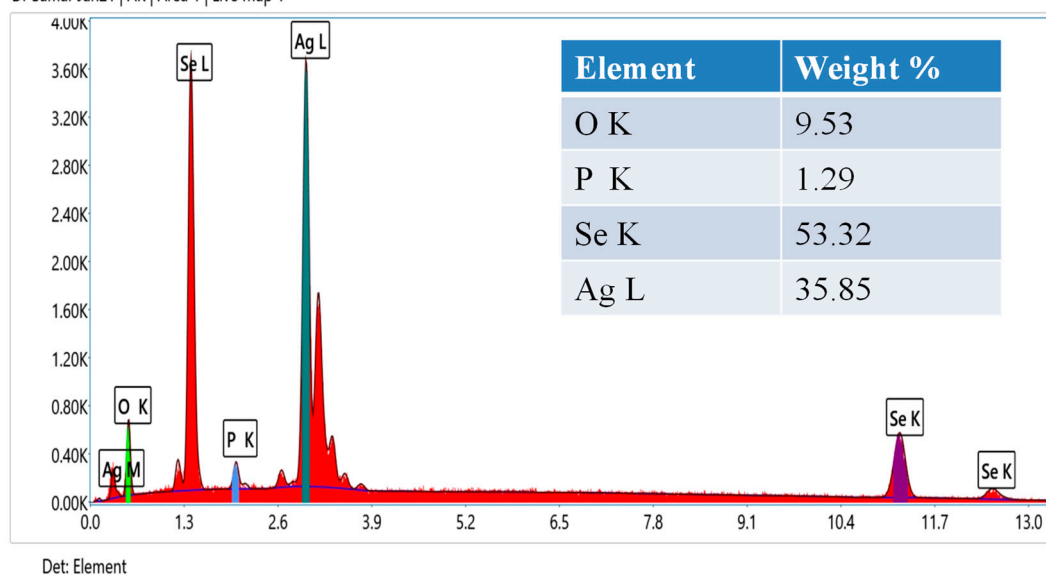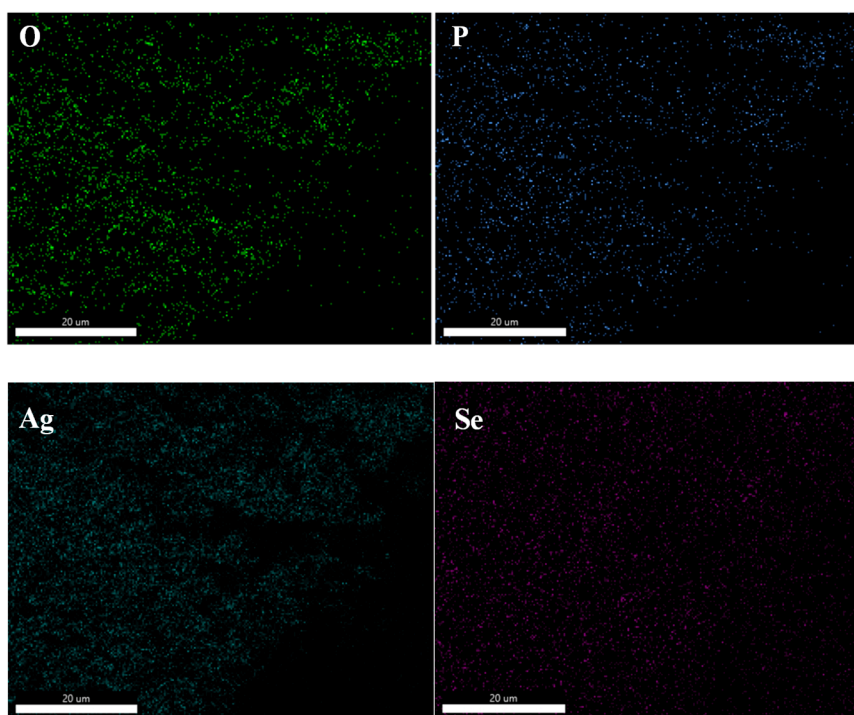

**Figure S2.** EDX spectrum and elemental (O, P, Ag, Se) mapping of Se-Ag<sub>3</sub>PO<sub>4</sub> nanoparticles.

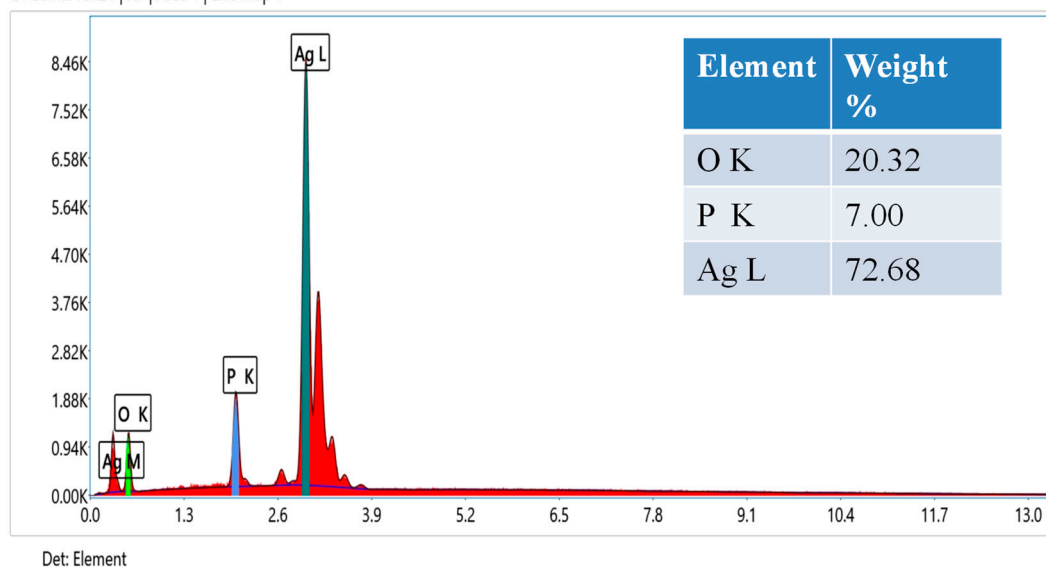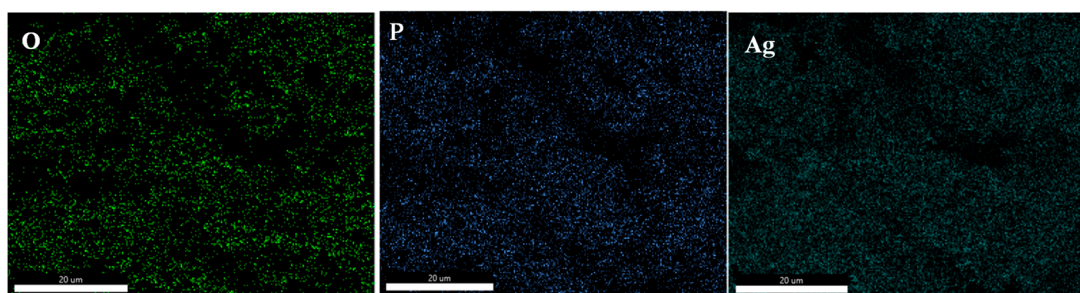

**Figure S3.** EDX spectrum and elemental (O, P, Ag) mapping of Ag-Ag<sub>3</sub>PO<sub>4</sub> nanoparticles.

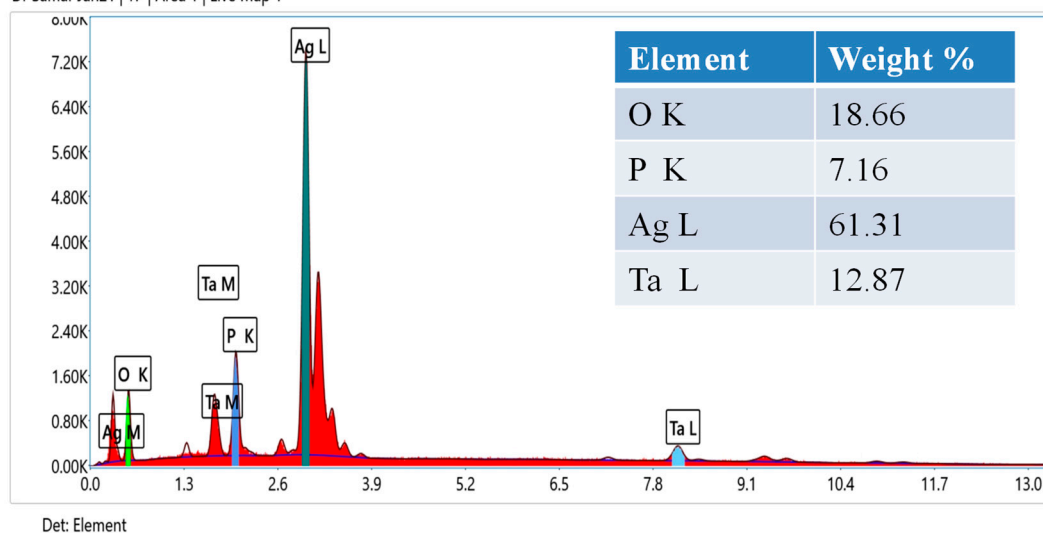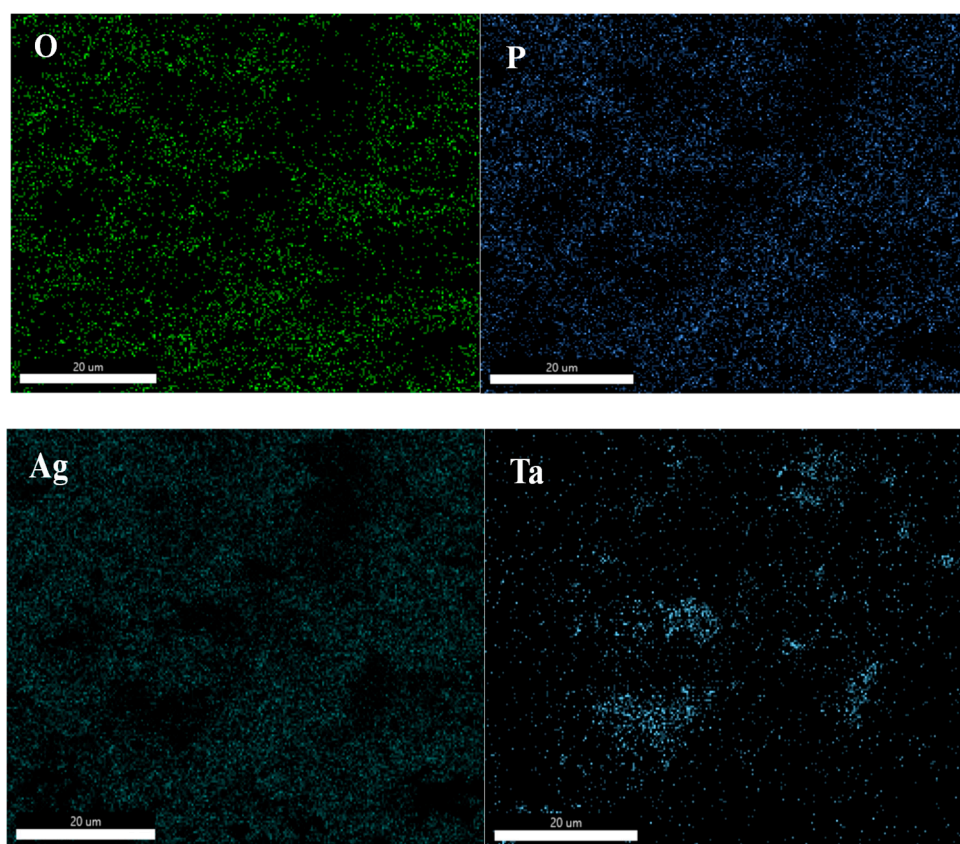

**Figure S4.** EDX spectrum and elemental (O, P, Ag, Ta) mapping of Ta-Ag<sub>3</sub>PO<sub>4</sub> nanoparticles.

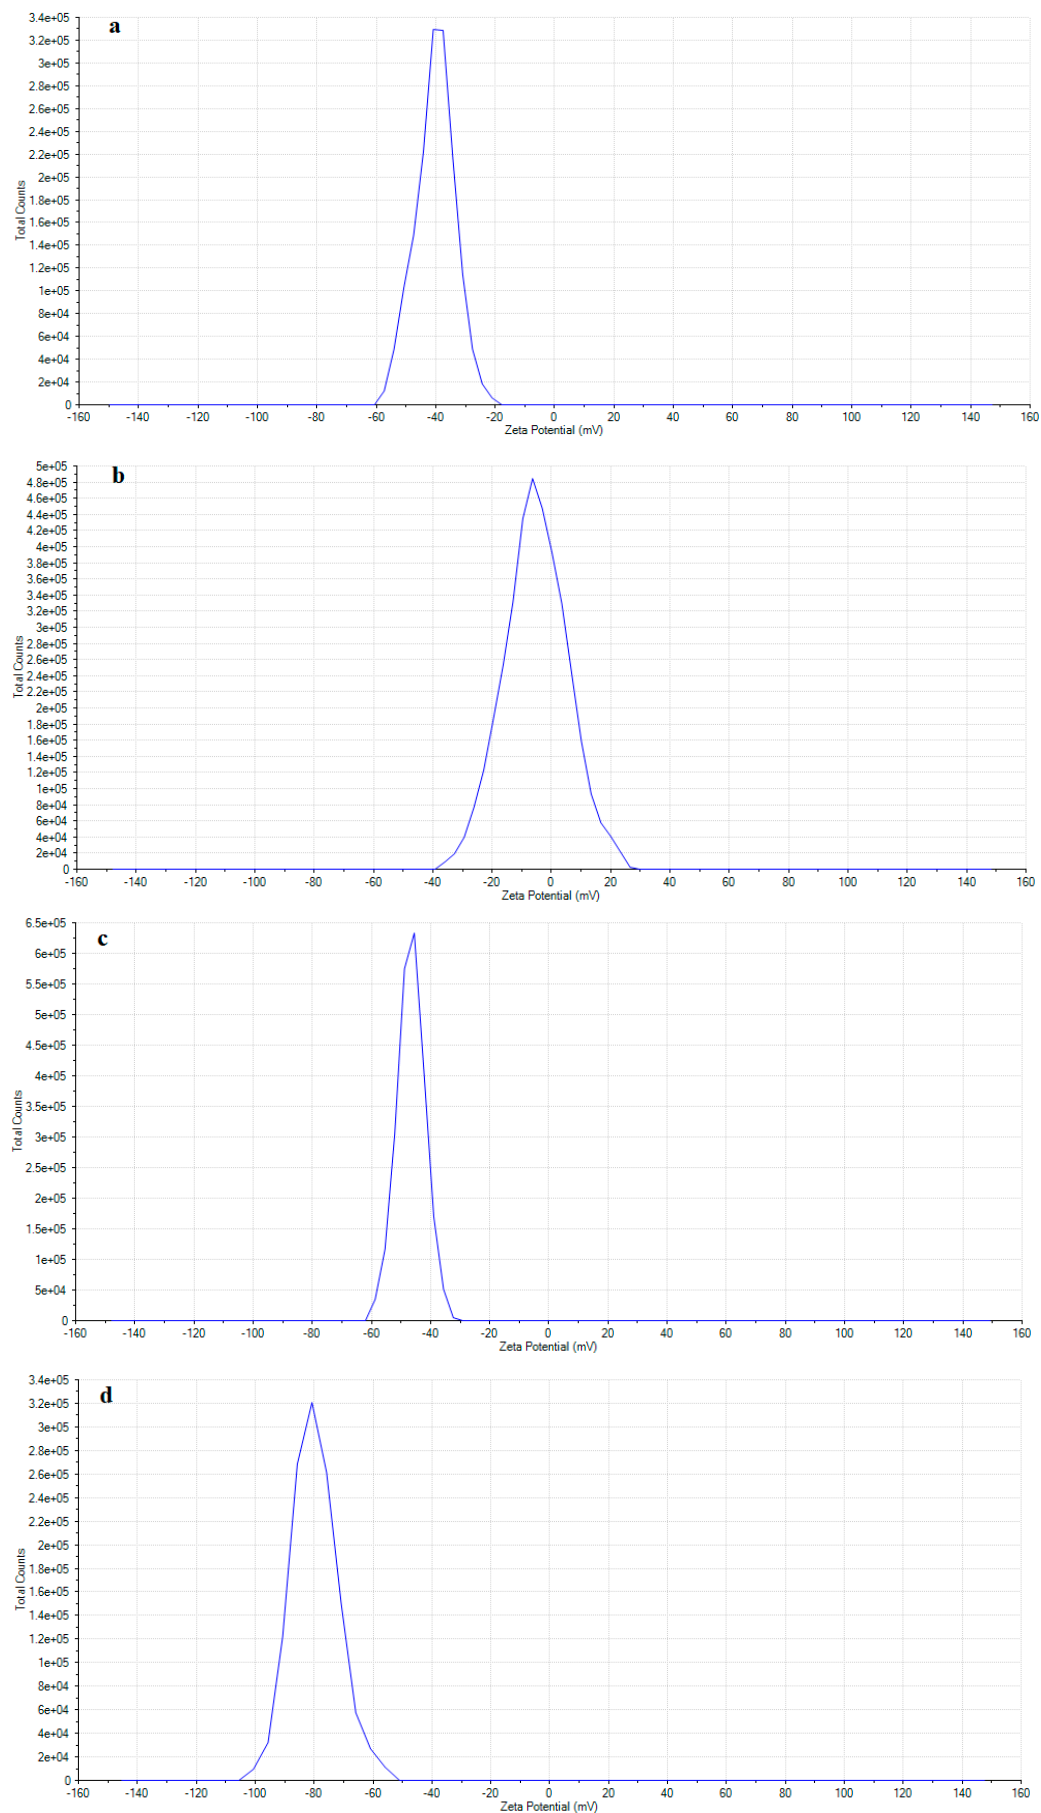

**Figure S5.** Zeta potential of  $\text{Ag}_3\text{PO}_4$  (a),  $\text{Se-Ag}_3\text{PO}_4$  (b),  $\text{Ag-Ag}_3\text{PO}_4$  (c),  $\text{Ta-Ag}_3\text{PO}_4$  (d) nanoparticles.

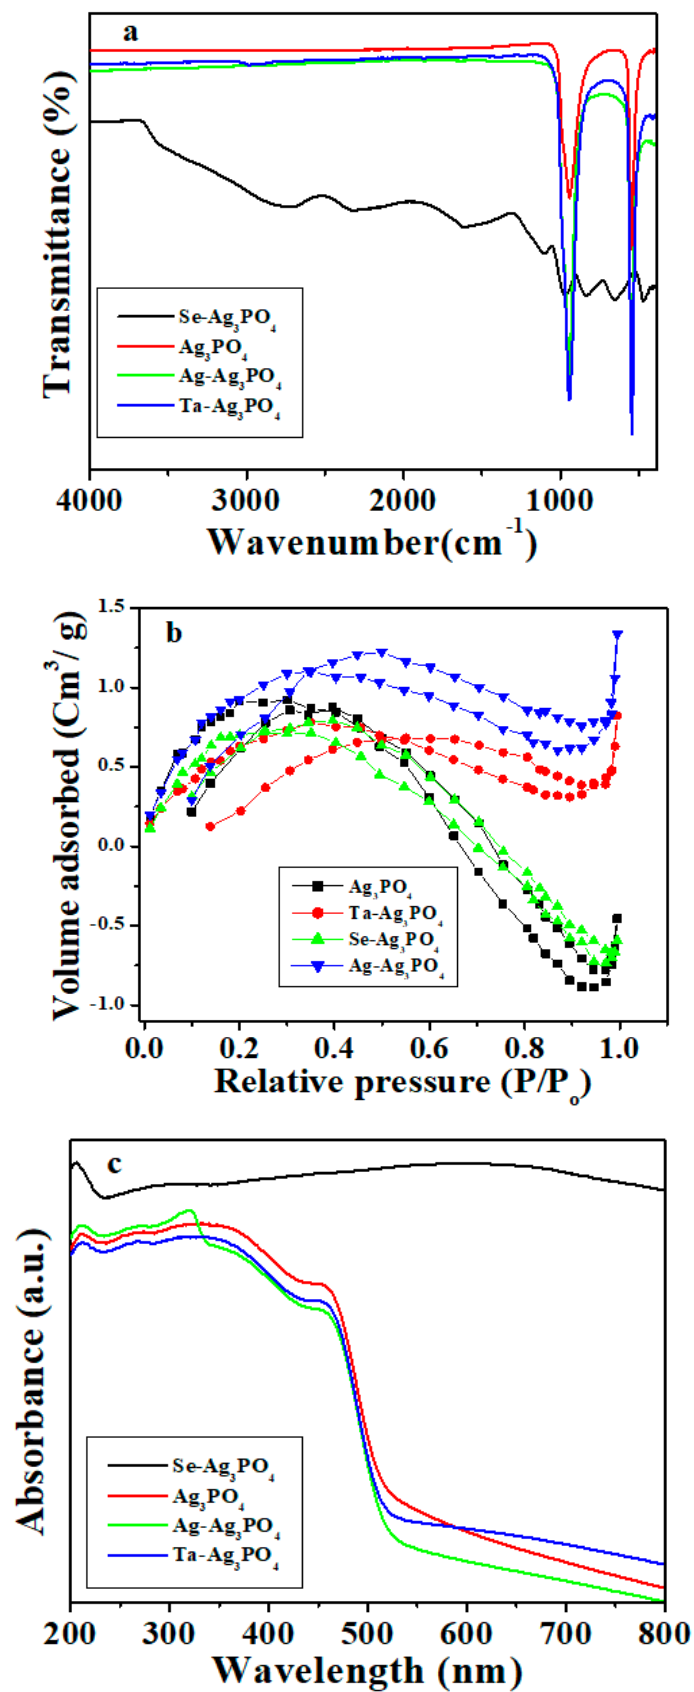

**Figure S6.** FTIR spectra (a),  $\text{N}_2$ -adsorption-desorption isotherms (b) and UV-Visible spectra (c) of  $\text{Ag}_3\text{PO}_4$ ,  $\text{Se-Ag}_3\text{PO}_4$ ,  $\text{Ag-Ag}_3\text{PO}_4$ , and  $\text{Ta-Ag}_3\text{PO}_4$  nanoparticles.
